# Supplementary material
Source: Springer Nature journal article supplement (https://www.springermedizin.de/resource/supplementary/13014_2010_234_MOESM2_ESM.pdf/9633234)
Supplement: MOESM2 [file 9633234]

Title and abstract screening

N=392

Excluded at title and abstract

N=373

Full text screening

N=19

1 Excluded

Unable reclassify the lymph  
nodes according to the rule of  
JPS Classification

Eligible studies

N=18

**12 Studies about pancreatic head cancer:**

-----11 Studies reported using JPS Classification

1 Studies reclassified according to JPS Classification

**2 Studies about pancreatic body/tail cancer:**

-----2 Studies reported using JPS Classification

**4 Studies about general pancreatic cancer:**

-----2 Studies reported using JPS Classification

2 Studies reclassified according to JPS Classification
